# Supplementary material for: The Effect of Silymarin Flavonolignans and Their Sulfated Conjugates on Platelet Aggregation and Blood Vessels Ex Vivo
Source: PubMed Central journal article supplement (PMC6836034; doi:10.3390/nu11102286), 2019-09-24
Supplement: nutrients-11-02286-s001.pdf [file nutrients-11-02286-s001.pdf]

Supplementary data

# The effect of silymarin flavonolignans and their sulfated conjugates on platelet aggregation and blood vessels *ex vivo*

Jana Pourová <sup>1</sup>, Lenka Applová <sup>1</sup>, Kateřina Macáková <sup>2</sup>, Marie Vopršalová <sup>1</sup>, Thomas Migkos <sup>1</sup>, Roger Bentanachs <sup>1,3</sup>, David Biedermann <sup>4</sup>, Lucie Petrásková <sup>4</sup>, Václav Tvrđý <sup>1</sup>, Marcel Hrubša <sup>1</sup>, Jana Karlíčková <sup>2</sup>, Vladimír Křen <sup>4</sup>, Kateřina Valentová <sup>4\*</sup>, Přemysl Mladěnka <sup>1\*</sup>

<sup>1</sup> Department of Pharmacology and toxicology, Faculty of Pharmacy in Hradec Králové, Charles University, Heyrovského 1203, 500 05 Hradec Králové, Czech Republic; [jana.pourova@faf.cuni.cz](mailto:jana.pourova@faf.cuni.cz) (J.P.); [applovl@faf.cuni.cz](mailto:applovl@faf.cuni.cz) (L.A.); [yoprsalova@faf.cuni.cz](mailto:yoprsalova@faf.cuni.cz) (M.V.); [migkost@faf.cuni.cz](mailto:migkost@faf.cuni.cz) (T.M.); [tvrdyvac@faf.cuni.cz](mailto:tvrdyvac@faf.cuni.cz) (V.T.); [hruksam@faf.cuni.cz](mailto:hruksam@faf.cuni.cz) (M.H.)

<sup>2</sup> Department of Pharmaceutical Botany, Faculty of Pharmacy in Hradec Králové, Charles University, Heyrovského 1203, 500 05 Hradec Králové, Czech Republic; [macakovak@faf.cuni.cz](mailto:macakovak@faf.cuni.cz) (K.M.); [karlickova@faf.cuni.cz](mailto:karlickova@faf.cuni.cz) (J.K.)

<sup>3</sup> Department of Pharmacology, Toxicology and Therapeutic Chemistry, School of Pharmacy and Food Science, University of Barcelona, Avda. Joan XXII 27-31, 08028, Barcelona, Spain; [bentanachs96@gmail.com](mailto:bentanachs96@gmail.com) (R.B.)

<sup>4</sup> Institute of Microbiology of the Czech Academy of Sciences, Vídeňská 1083, 142 20 Prague, Czech Republic; [biedermann@biomed.cas.cz](mailto:biedermann@biomed.cas.cz) (D.B.); [petraskova@biomed.cas.cz](mailto:petraskova@biomed.cas.cz) (L.P.); [kren@biomed.cas.cz](mailto:kren@biomed.cas.cz) (V.K.)

\* Correspondence: [kata.valentova@email.com](mailto:kata.valentova@email.com) (K.V.); [mladenkap@faf.cuni.cz](mailto:mladenkap@faf.cuni.cz) (P.M.)

## Table of contents

|                                                                                                                                  |     |
|----------------------------------------------------------------------------------------------------------------------------------|-----|
| <b>Figure S1.</b> HPLC chromatograms of the compounds tested .....                                                               | 2-3 |
| <b>Figure S2.</b> Comparison of <i>ex vivo</i> vasorelaxant effects of stereomers .....                                          | 3   |
| <b>Figure S3.</b> Vasorelaxant effects of equimolar mixture of stereomers (A+B).....                                             | 4   |
| <b>Figure S4.</b> Comparison of <i>ex vivo</i> vasorelaxant effects of 2,3-dehydrosilybin and its conjugates. ....               | 4   |
| <b>Figure S5.</b> Effect of flavonolignans on platelet aggregation induced by collagen in whole blood. ....                      | 5   |
| <b>Figure S6.</b> Effect of flavonolignans on whole blood platelet aggregation induced by arachidonic acid.....                  | 5   |
| <b>Figure S7.</b> Comparison of tested flavonolignans and 1-benzylimidazole on thromboxane A <sub>2</sub> synthase activity..... | 6   |
| <b>Figure S8.</b> Effect of tested compounds on aggregation induced by the thromboxane analogue U-46619.....                     | 6   |
| <b>Table S1.</b> Effect of flavonolignans on collagen induced platelet aggregation at 240 μM.....                                | 7   |
| <b>Table S2.</b> Effect of flavonolignans on collagen induced platelet aggregation at 120 μM.....                                | 8   |
| <b>Table S3.</b> Effect of flavonolignans on arachidonic acid induced platelet aggregation at 240 μM.....                        | 9   |
| <b>Table S4.</b> Effect of flavonolignans on AA induced platelet aggregation at 120 μM. ....                                     | 10  |

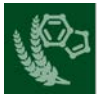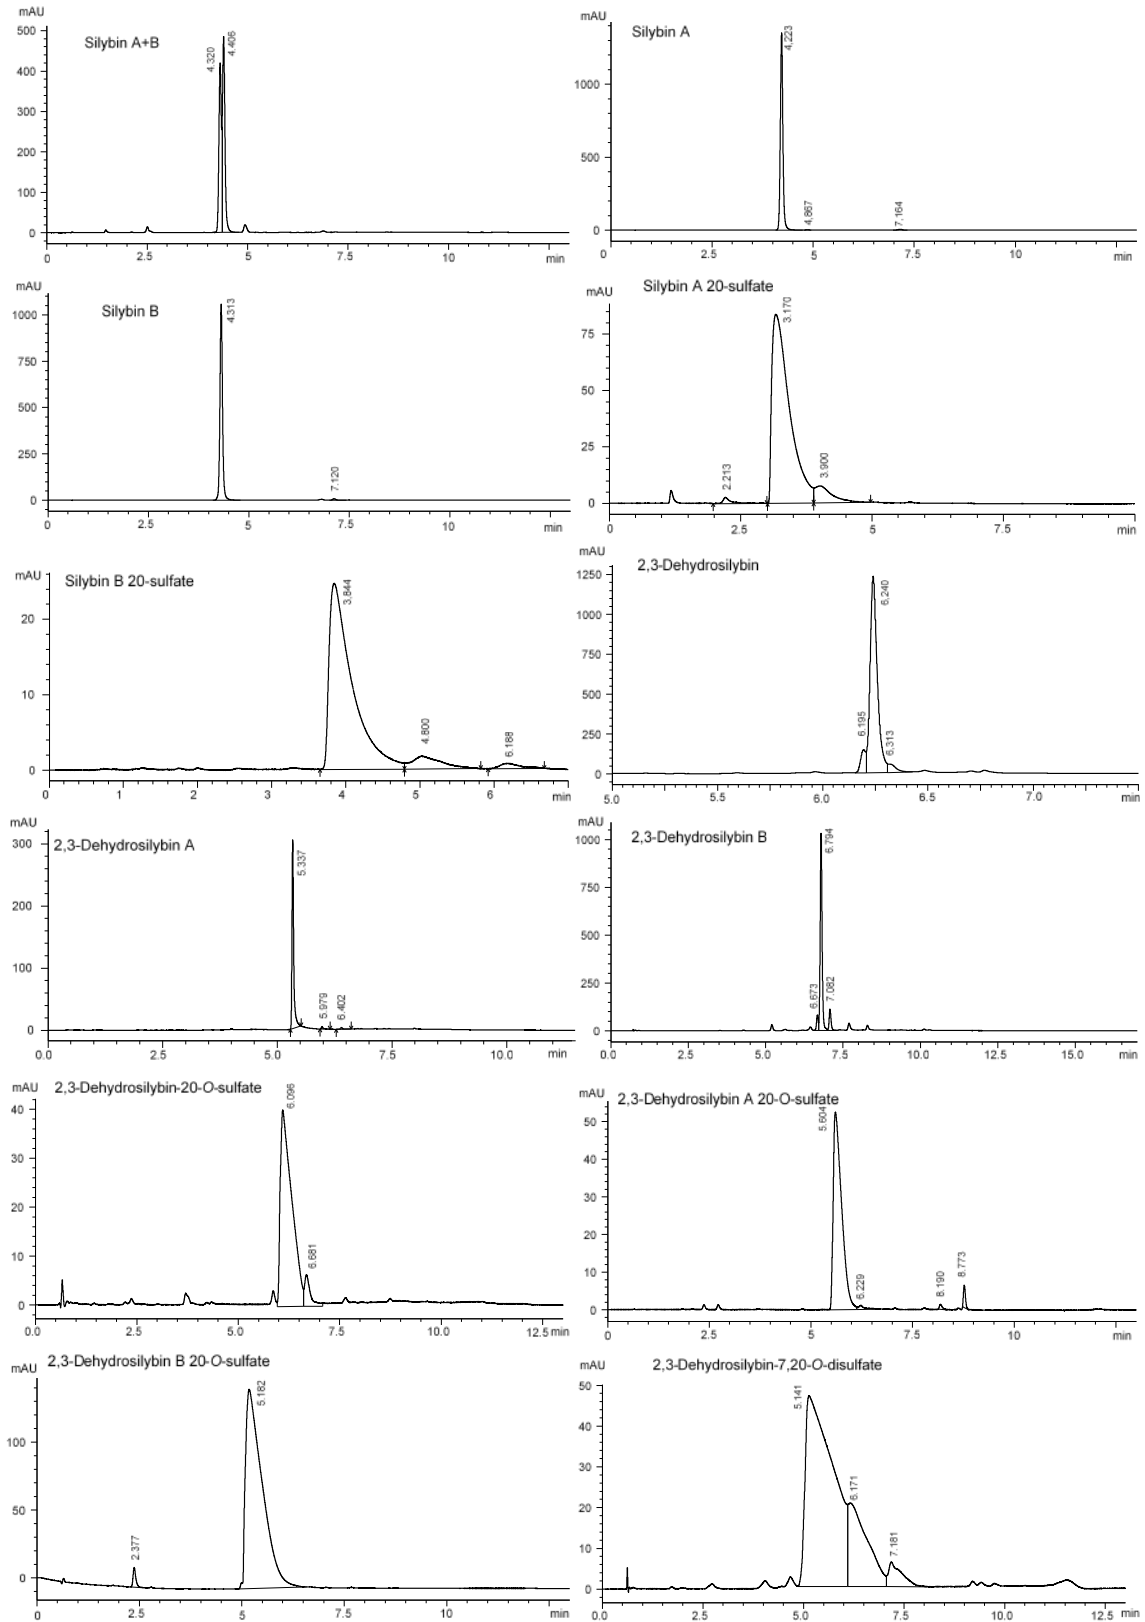

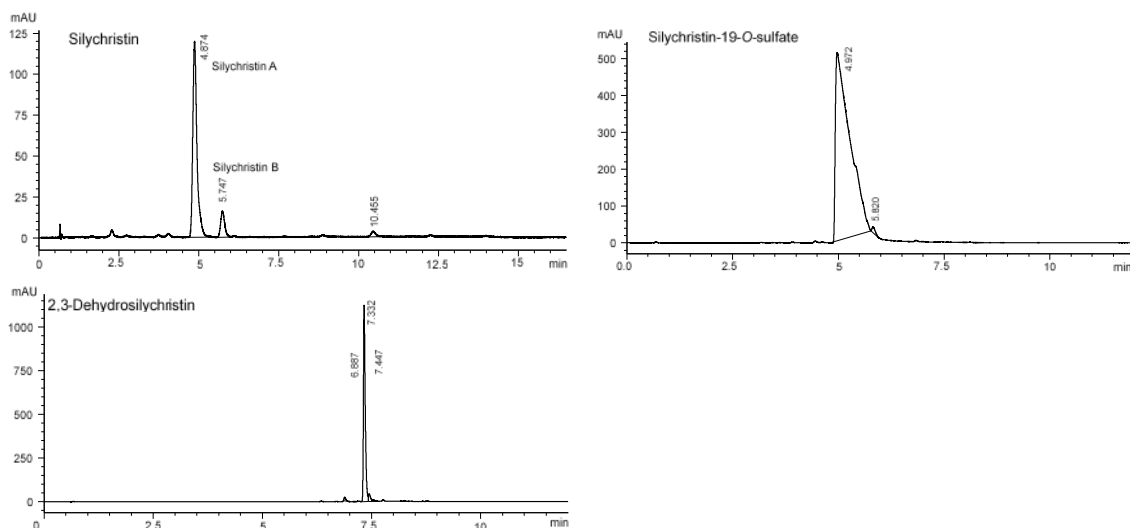

**Figure S1.** HPLC chromatograms of the compounds tested  
HPLC gradient method: Chromolith RP-18e (100 × 3 mm) column equipped with Chromolith RP-18e guard cartridge (5 × 4.6 mm), mobile phase A=5% acetonitrile in water, 0.1% HCOOH; mobile phase B= 80% acetonitrile in water, 0.1% HCOOH; gradient: 0-5 min 0-25 % B, 5-8 min 25-60 % B, 8-10 min 60 % B, 10-11 min 60-0 %B, 12 min stop. Flow rate was 1.2 mL/min, temperature 25 °C.

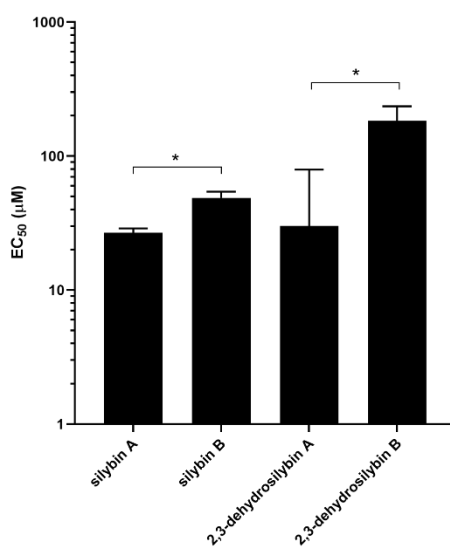

**Figure S2.** Comparison of *ex vivo* vasorelaxant effects of stereoisomers  
Silybin A and 2,3-dehydrosilybin A were compared with respective B stereoisomers on intact rat aortic rings precontracted with phenylephrine. The EC<sub>50</sub> values of both diastereoisomers A were significantly lower than the EC<sub>50</sub> values of corresponding diastereoisomers B. Number of used rings: 4 (for silybin A and silybin B), 6 (2,3-dehydrosilybin A) and 3 (2,3-dehydrosilybin B). \* p < 0.05.

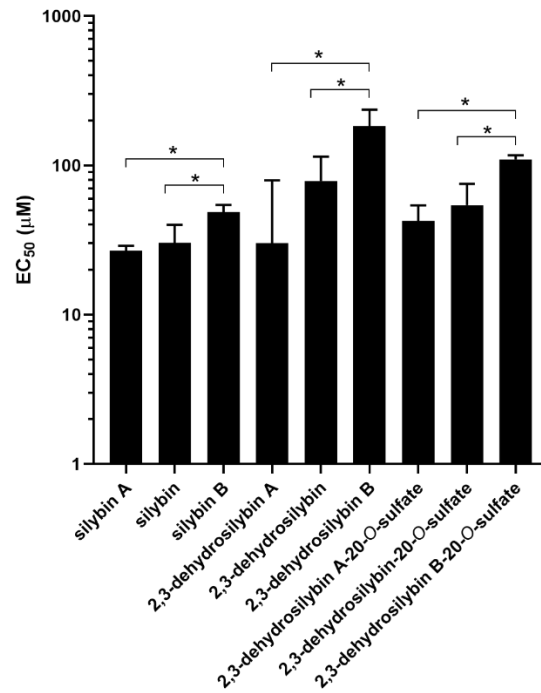

**Figure S3.** Vasorelaxant effects of equimolar mixture of stereomers (A+B). The effect was studied *ex vivo* on intact rat aortic rings precontracted with phenylephrine. No potentiation or inhibition of vasorelaxant potency was observed. Number of used rings: 6 for 2,3-dehydrosilybin A, 3 for 2,3-dehydrosilybin B and 2,3-dehydrosilybin B-20-O-sulfate, 5 for 2,3-dehydrosilybin A-20-O-sulfate, and 4 for other substances. \*  $p < 0.05$ .

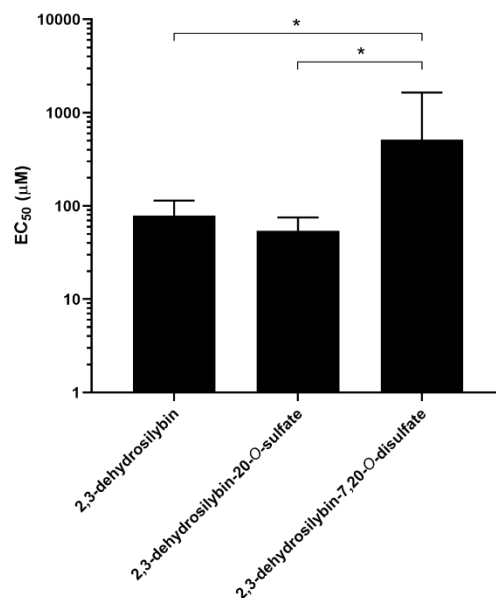

**Figure S4.** Comparison of *ex vivo* vasorelaxant effects of 2,3-dehydrosilybin and its conjugates. The effect of 2,3-dehydrosilybin was compared with that of 2,3-dehydrosilybin-20-O-sulfate and 2,3-dehydrosilybin-7,20-O-disulfate on intact rat aortic rings precontracted with phenylephrine.  $N = 4$ ; \*  $p < 0.05$ .

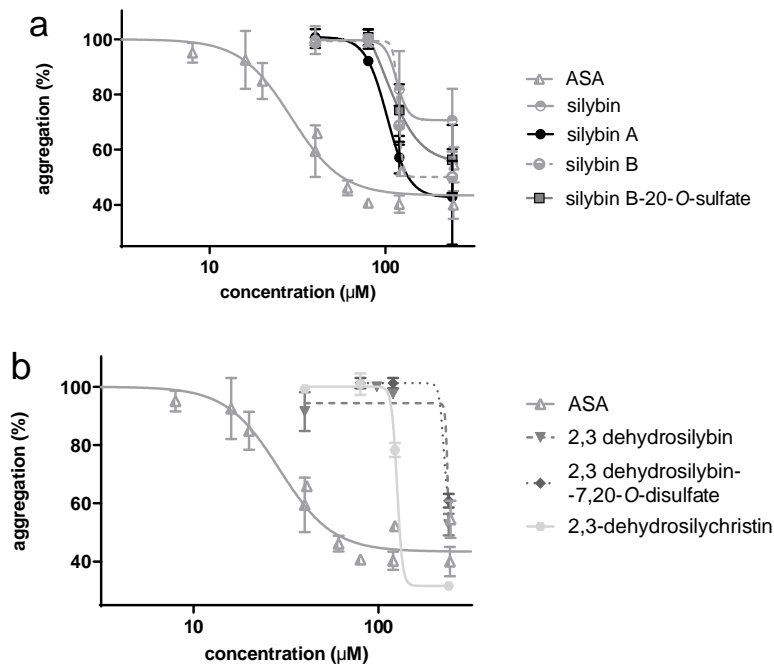

**Figure S5.** Effect of flavonolignans on platelet aggregation induced by collagen in whole blood. (a): Concentration-dependent curves of the most active silybins, (b): Concentration-dependent curves of the most active 2,3-dehydrosilybins and 2,3-dehydrosilychristin. ASA = acetylsalicylic acid.

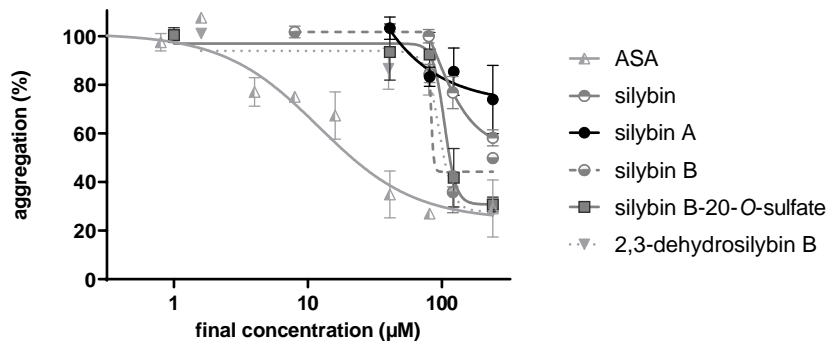

**Figure S6.** Effect of flavonolignans on whole blood platelet aggregation induced by arachidonic acid. Concentration-dependent curves of selected active substances; ASA = acetylsalicylic acid.

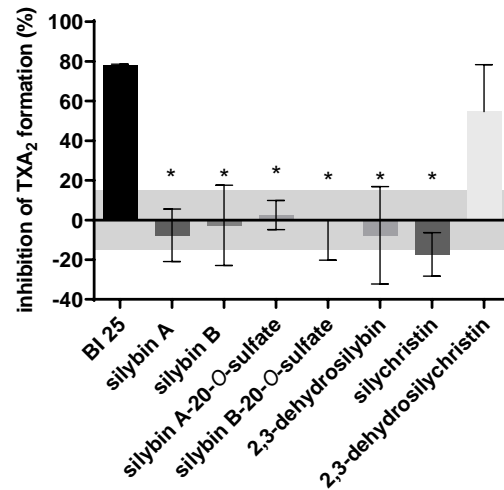

**Figure S7.** Comparison of tested flavonolignans and 1-benzylimidazole on thromboxane A<sub>2</sub> synthase activity. Compounds were tested at 100  $\mu$ M while 1-benzylimidazole (BI 25) at 25  $\mu$ M. Data are expressed as mean  $\pm$  SD. \*  $p < 0.01$  vs. 1-benzylimidazole. Grey area means the error of the method.

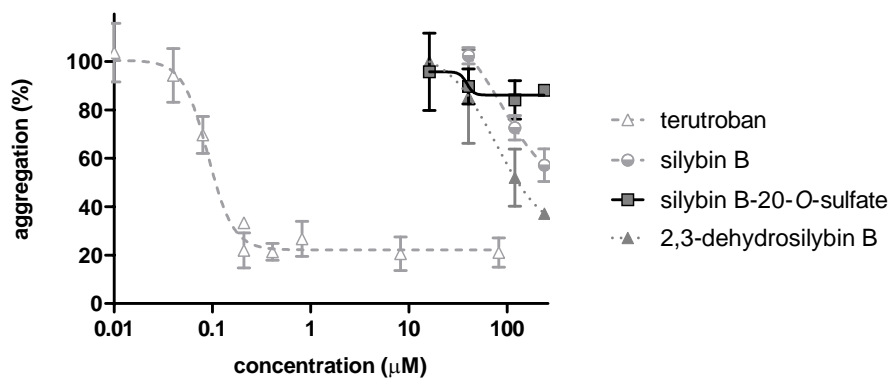

**Figure S8.** Effect of tested compounds on aggregation induced by the thromboxane analogue U-46619. The effect is presented as dose-dependent curves; terutroban is a standard antagonist of thromboxane receptors.

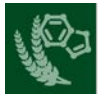

**Table S1.** Effect of flavonolignans on collagen induced platelet aggregation at 240  $\mu$ M.

|                                     |                             |         |           |           |                        |                        |                    |                                 |                                     |                      |                      |                                   |                                   |              |                           |                         |    |    |     |
|-------------------------------------|-----------------------------|---------|-----------|-----------|------------------------|------------------------|--------------------|---------------------------------|-------------------------------------|----------------------|----------------------|-----------------------------------|-----------------------------------|--------------|---------------------------|-------------------------|----|----|-----|
| silybin                             | **                          |         |           |           |                        |                        |                    |                                 |                                     |                      |                      |                                   |                                   |              |                           |                         |    |    |     |
| silybin A                           | ns                          | ns      |           |           |                        |                        |                    |                                 |                                     |                      |                      |                                   |                                   |              |                           |                         |    |    |     |
| silybin B                           | ns                          | ns      | ns        |           |                        |                        |                    |                                 |                                     |                      |                      |                                   |                                   |              |                           |                         |    |    |     |
| silybin A-20-O-sulfate              | **                          | ns      | **        | ns        |                        |                        |                    |                                 |                                     |                      |                      |                                   |                                   |              |                           |                         |    |    |     |
| silybin B-20-O-sulfate              | ns                          | ns      | ns        | ns        | ns                     |                        |                    |                                 |                                     |                      |                      |                                   |                                   |              |                           |                         |    |    |     |
| 2,3-dehydrosilybin                  | ns                          | ns      | ns        | ns        | ns                     | ns                     |                    |                                 |                                     |                      |                      |                                   |                                   |              |                           |                         |    |    |     |
| 2,3-dehydrosilybin-20-O-sulfate     | ***                         | ns      | ***       | **        | ns                     | *                      | *                  |                                 |                                     |                      |                      |                                   |                                   |              |                           |                         |    |    |     |
| 2,3-dehydrosilybin-7,20-O-disulfate | ns                          | ns      | ns        | ns        | ns                     | ns                     | ns                 | ns                              |                                     |                      |                      |                                   |                                   |              |                           |                         |    |    |     |
| 2,3-dehydrosilybin A                | ***                         | ns      | ***       | **        | ns                     | *                      | *                  | ns                              | ns                                  |                      |                      |                                   |                                   |              |                           |                         |    |    |     |
| 2,3-dehydrosilybin B                | ***                         | ns      | **        | *         | ns                     | ns                     | ns                 | ns                              | ns                                  | ns                   |                      |                                   |                                   |              |                           |                         |    |    |     |
| 2,3-dehydrosilybin A-20-O-sulfate   | ***                         | ns      | ***       | ***       | ns                     | ***                    | ***                | ns                              | **                                  | ns                   | ns                   |                                   |                                   |              |                           |                         |    |    |     |
| 2,3-dehydrosilybin B-20-O-sulfate   | ***                         | ns      | ***       | ***       | ns                     | **                     | **                 | ns                              | ns                                  | ns                   | ns                   | ns                                |                                   |              |                           |                         |    |    |     |
| silychristin                        | ***                         | ns      | ***       | **        | ns                     | *                      | *                  | ns                              | ns                                  | ns                   | ns                   | ns                                | ns                                |              |                           |                         |    |    |     |
| silychristin-19-O-sulfate           | ***                         | ns      | ***       | ***       | ns                     | **                     | **                 | ns                              | *                                   | ns                   | ns                   | ns                                | ns                                | ns           |                           |                         |    |    |     |
| 2,3-dehydrosilychristin             | ns                          | **      | ns        | ns        | ***                    | ns                     | ns                 | ***                             | ns                                  | ***                  | ***                  | ***                               | ***                               | ***          | ***                       |                         |    |    |     |
| DMSO                                | ***                         | *       | ***       | ***       | ns                     | ***                    | ***                | ns                              | **                                  | ns                   | ns                   | ns                                | ns                                | ns           | ns                        | ns                      | ns | ns | *** |
|                                     | acetyl salicylic acid (ASA) | silybin | silybin A | silybin B | silybin A-20-O-sulfate | silybin B-20-O-sulfate | 2,3-dehydrosilybin | 2,3-dehydrosilybin-20-O-sulfate | 2,3-dehydrosilybin-7,20-O-disulfate | 2,3-dehydrosilybin A | 2,3-dehydrosilybin B | 2,3-dehydrosilybin A-20-O-sulfate | 2,3-dehydrosilybin B-20-O-sulfate | silychristin | silychristin-19-O-sulfate | 2,3-dehydrosilychristin |    |    |     |

ns  $p \geq 0.05$ , \*  $p < 0.05$ , \*\*  $p < 0.01$ , \*\*\*  $p < 0.001$
